# Supplementary material
Source: publisher site journal article supplement (https://www.dovepress.com/article/356444)
Supplement: Supplementary file 1 [file get_supplementary_file.php]

## Supplementary materials

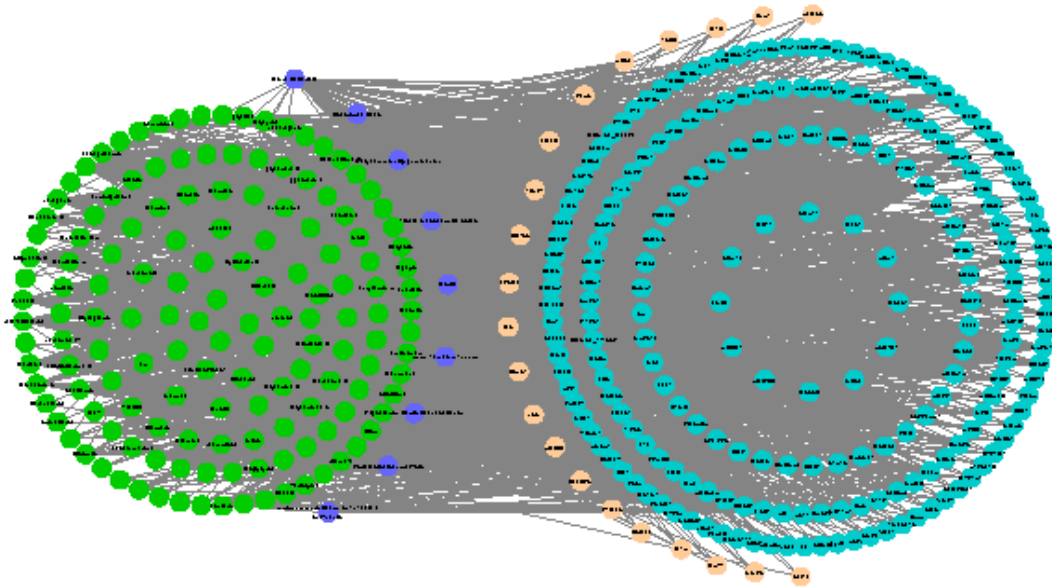

Supplementary Figure S1. A network among FPQXZ, molecules of FPQXZ, and COVID-19-related target genes.

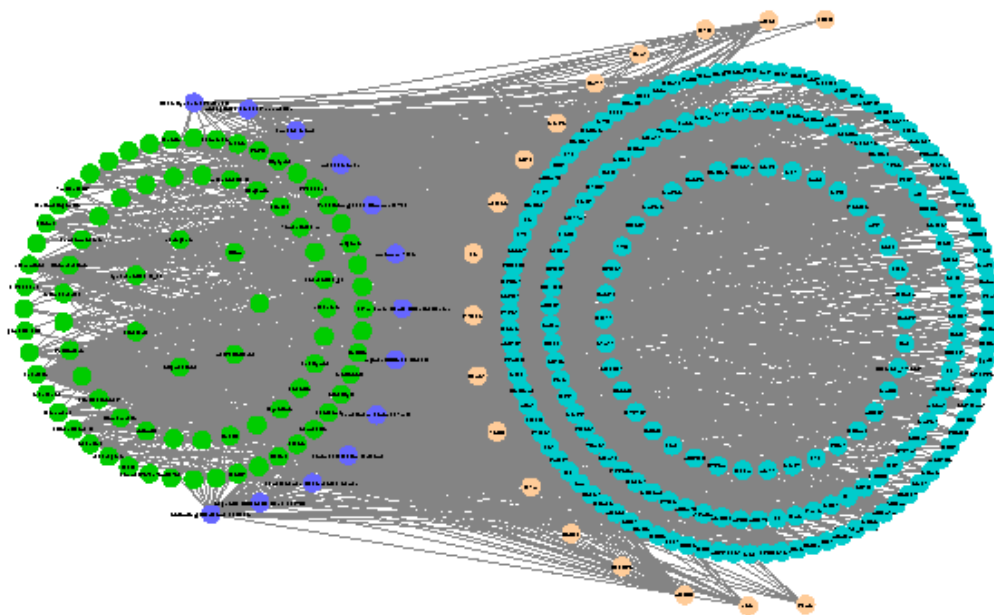

Supplementary Figure S2. A network among HSYFZ, molecules of HSYFZ, and COVID-19-related target genes.

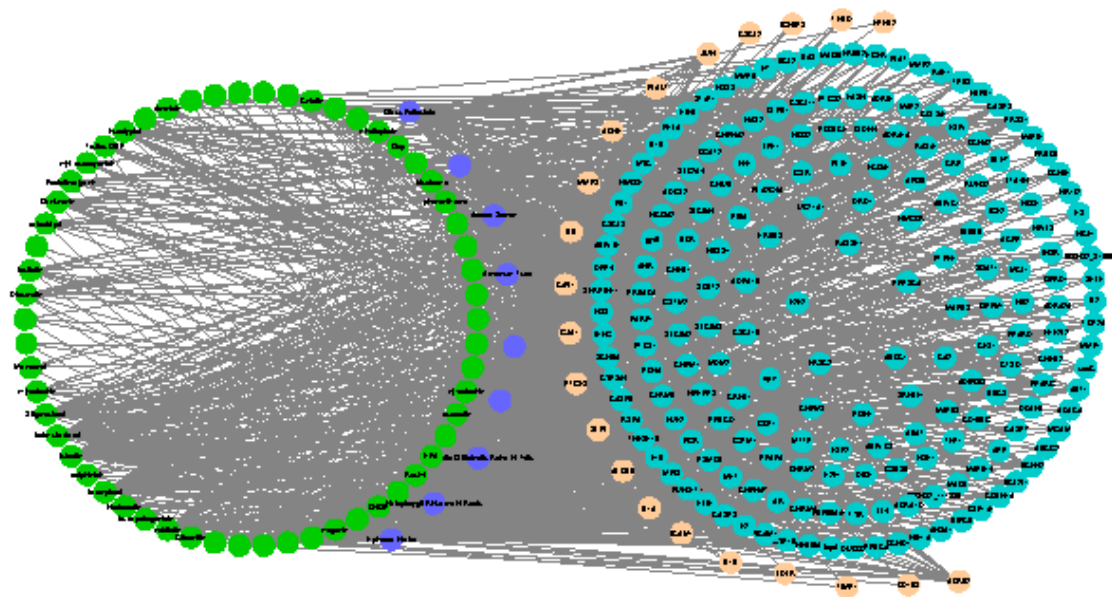

Supplementary Figure S3. A network among HSZFZ, molecules of HSZFZ, and COVID-19-related target genes.

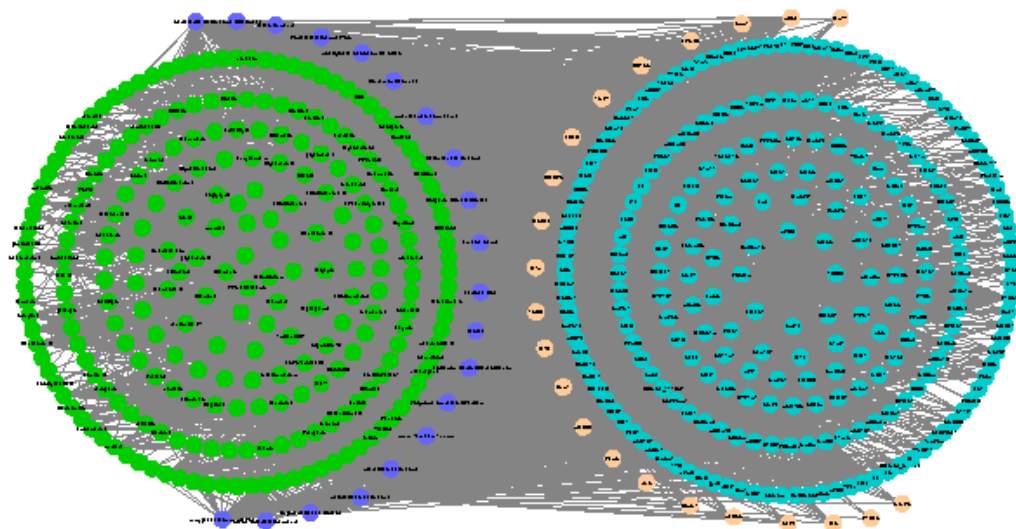

Supplementary Figure S4. A network among QFPDT, molecules of QFPDT, and COVID-19-related target genes.

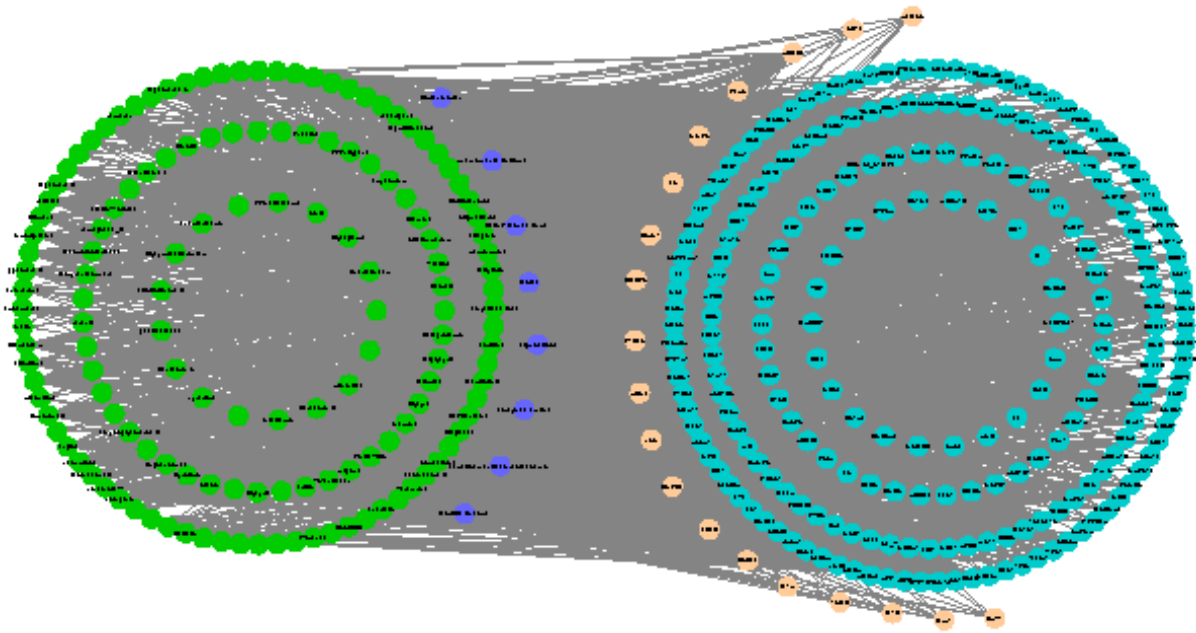

Supplementary Figure S5. A network among QYLFZ, molecules of QYLFZ, and COVID-19-related target genes.

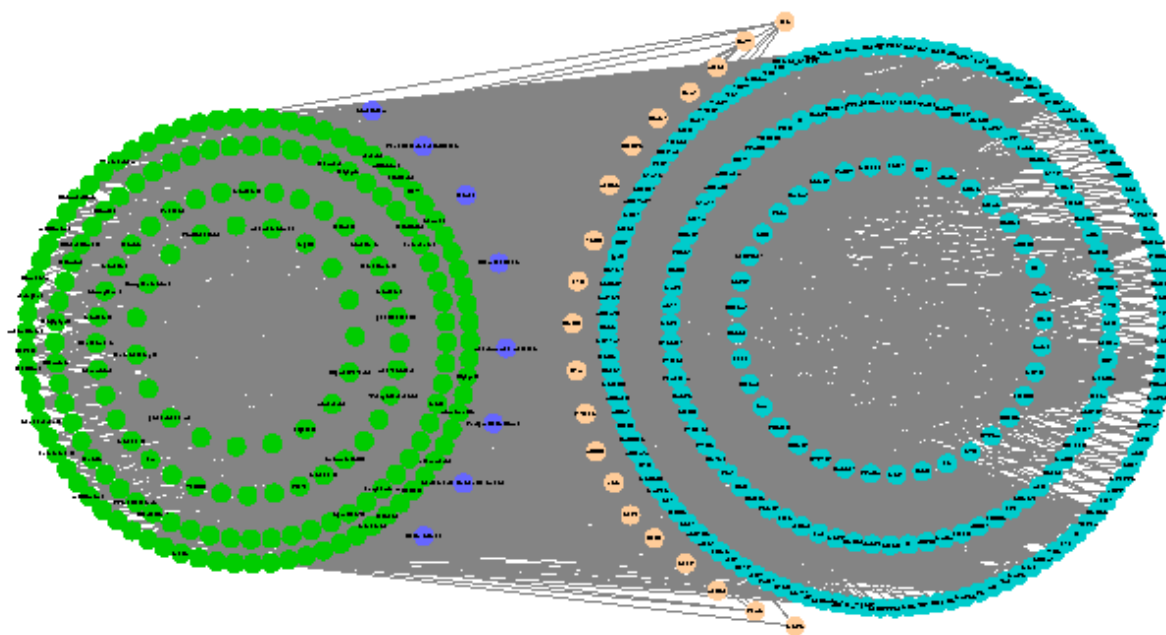

Supplementary Figure S6. A network among QYLXZ, molecules of QYLXZ, and COVID-19-related target genes.

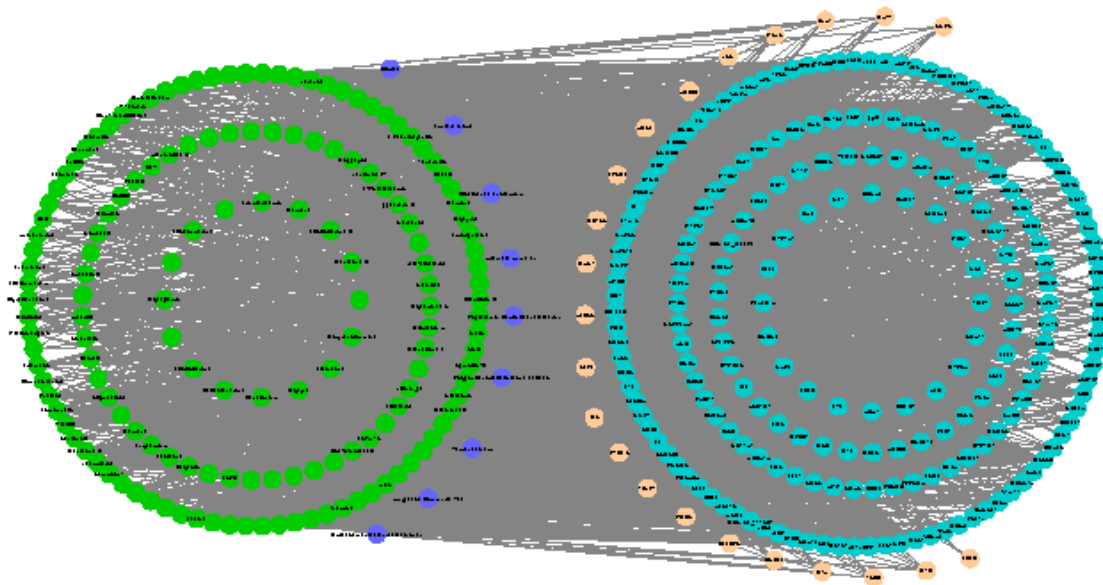

Supplementary Figure S7. A network among SDYFZ, molecules of SDYFZ, and COVID-19-related target genes.

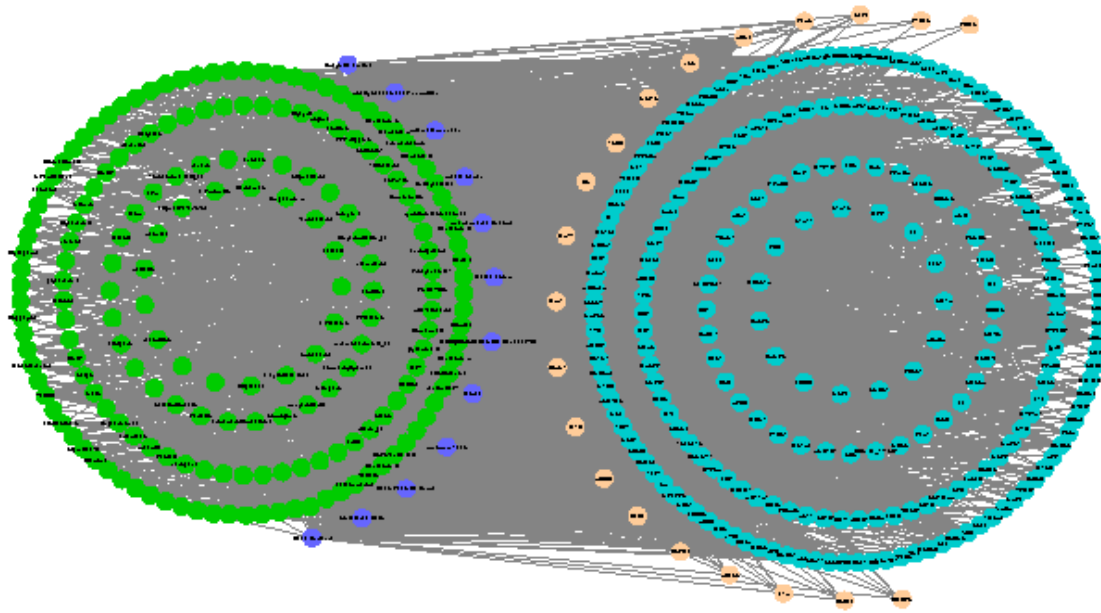

Supplementary Figure S8. A network among SRYFZ, molecules of SRYFZ, and COVID-19-related target genes.



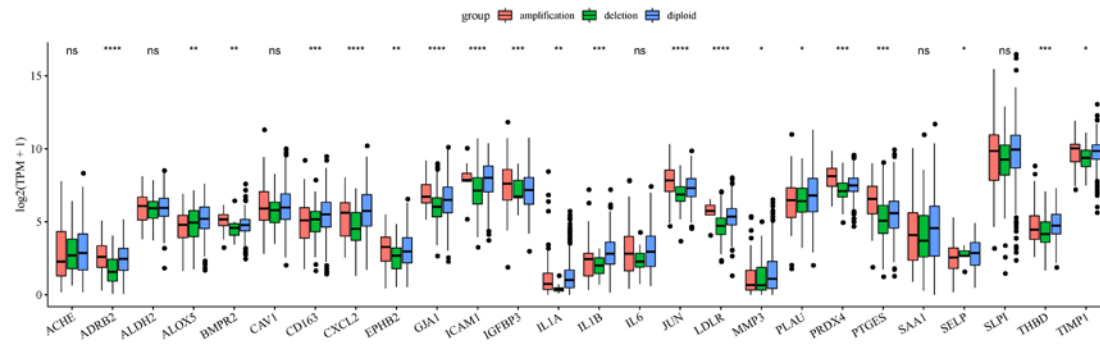

Supplementary Figure S9. The expression of 26 COVID-19 target genes grouped by CNVs.

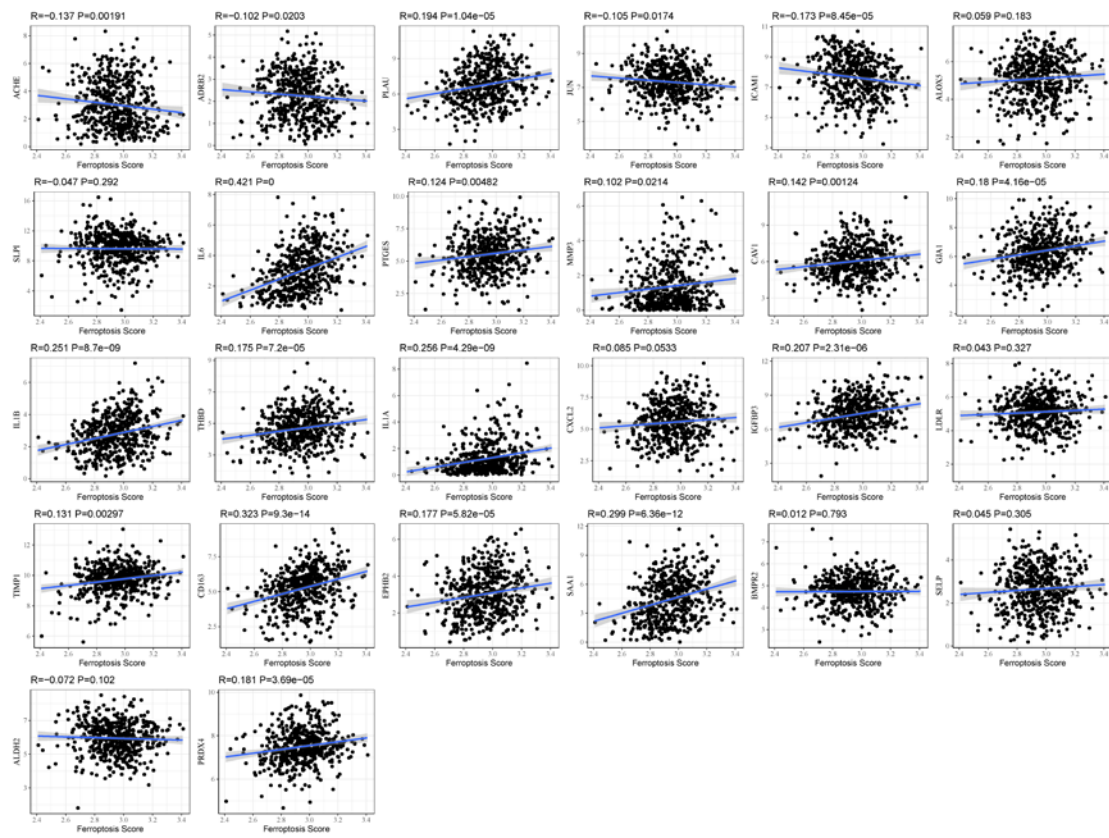

Supplementary Figure S10. Pearson correlation analysis between 26 COVID-19 target genes and ferroptosis.

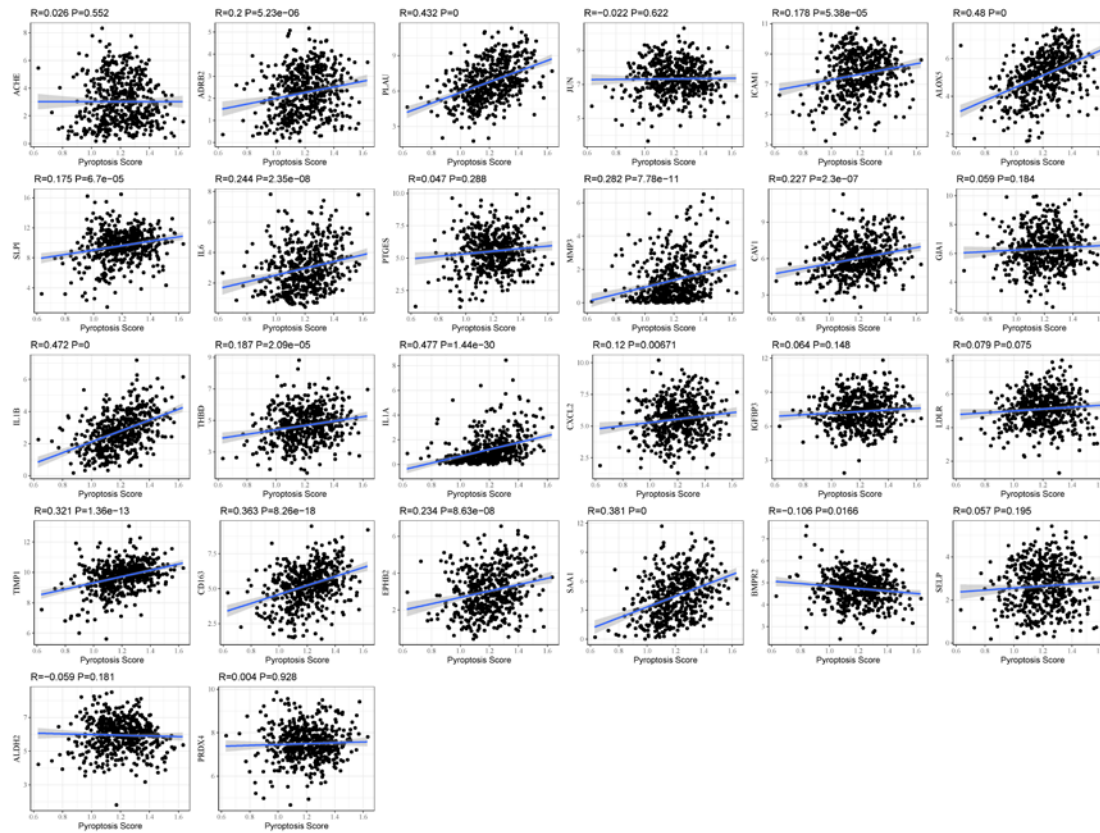

Supplementary Figure S11. Pearson correlation analysis between 26 COVID-19 target genes and pyroptosis.

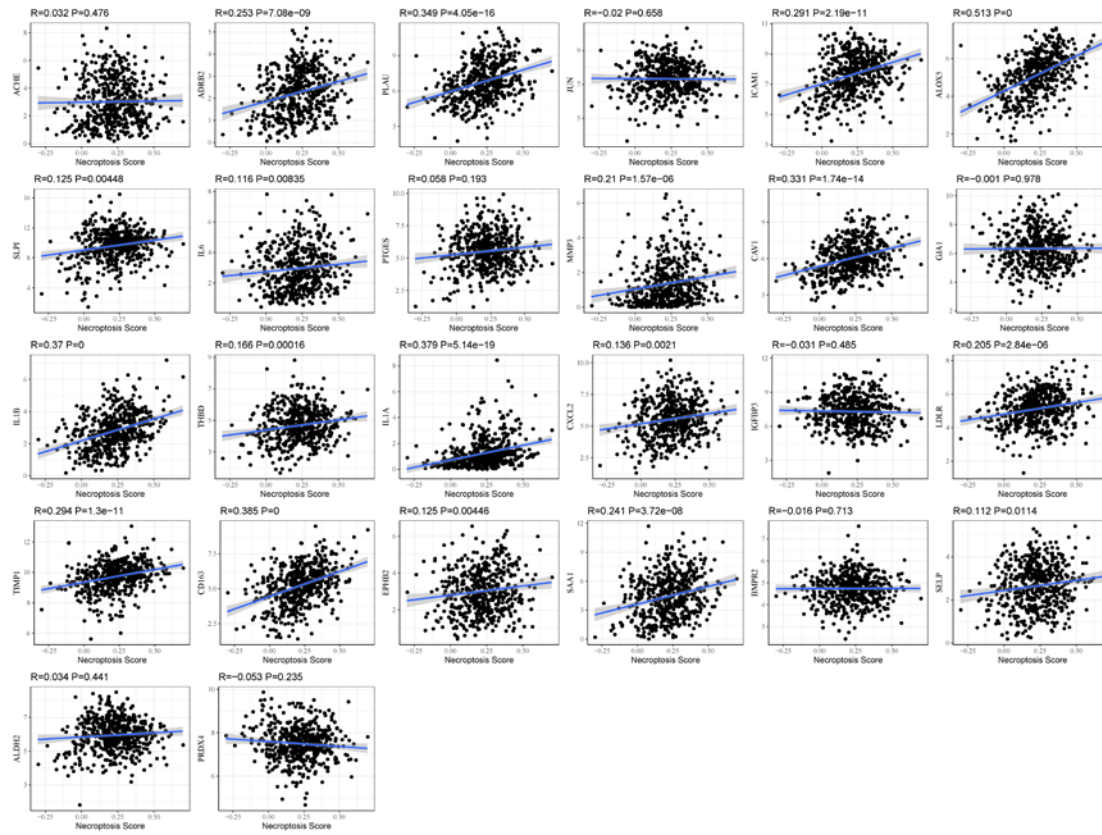

Supplementary Figure S12. Pearson correlation analysis between 26 COVID-19 target genes and necroptosis.

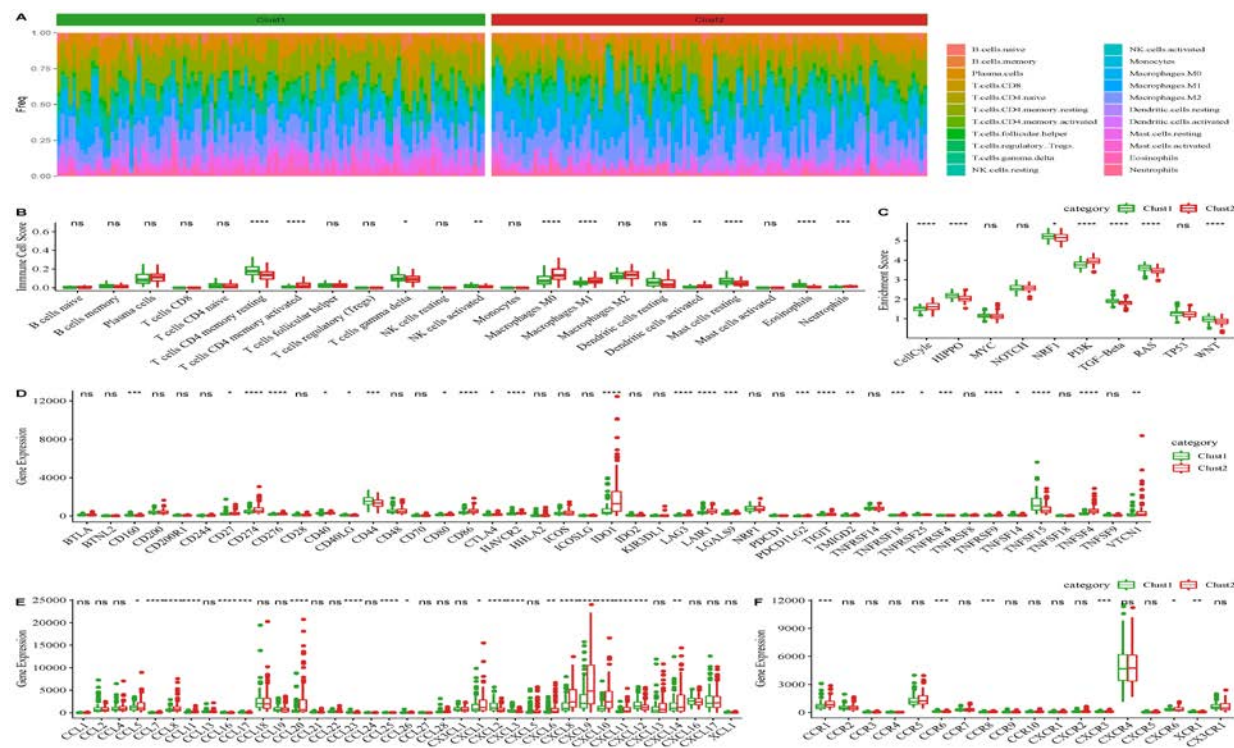

Supplementary Figure S13. TME features of two molecular subtypes in GSE31210 dataset. (A) A heatmap of the proportion of 22 immune cells in two subtypes. (B) Enrichment score of 22 immune cells in two subtypes. (C) Enrichment score of 10 oncogenic pathways. (D) Expression of 47 immune checkpoints in two subtypes. (E-F) Expression of chemokines (E) and chemokine receptors (F) in two subtypes. Student t test was conducted between two groups. ns, no significance. \* $P < 0.05$ , \*\* $P < 0.01$ , \*\*\* $P < 0.001$ , \*\*\*\* $P < 0.0001$ .

Supplementary Table S1. The relations among the top 10 effective molecules of FPQXZ, TCMs and COVID-19-related genes.

| Molecule ID | Molecules                     | Targets                    | COVID-19-related genes | TCMs                                        |
|-------------|-------------------------------|----------------------------|------------------------|---------------------------------------------|
| MOL000098   | quercetin                     | Beta-2 adrenergic receptor | ADRB2                  | Hedysarum Multijugum Maxim.                 |
| MOL000098   | quercetin                     | Beta-2 adrenergic receptor | ADRB2                  | licorice                                    |
| MOL000098   | quercetin                     | Beta-2 adrenergic receptor | ADRB2                  | Pogostemon Cablin (Blanco) Benth.           |
| MOL003896   | 7-Methoxy-2-methyl isoflavone | Beta-2 adrenergic receptor | ADRB2                  | Codonopsis Radix                            |
| MOL003896   | 7-Methoxy-2-methyl isoflavone | Beta-2 adrenergic receptor | ADRB2                  | licorice                                    |
| MOL000378   | 7-O-methylisomucronulatol     | Beta-2 adrenergic receptor | ADRB2                  | Hedysarum Multijugum Maxim.                 |
| MOL000392   | formononetin                  | Beta-2 adrenergic receptor | ADRB2                  | Hedysarum Multijugum Maxim.                 |
| MOL000392   | formononetin                  | Beta-2 adrenergic receptor | ADRB2                  | licorice                                    |
| MOL000358   | beta-sitosterol               | Beta-2 adrenergic receptor | ADRB2                  | Amomum Aurantiacum H. T. Tsai Et S. W. Zhao |
| MOL000358   | beta-sitosterol               | Beta-2 adrenergic receptor | ADRB2                  | Arum Ternatum Thunb.                        |
| MOL000098   | quercetin                     | Acetylcholinesterase       | ACHE                   | Hedysarum Multijugum Maxim.                 |
| MOL000098   | quercetin                     | Acetylcholinesterase       | ACHE                   | licorice                                    |
| MOL000098   | quercetin                     | Acetylcholinesterase       | ACHE                   | Pogostemon Cablin (Blanco) Benth.           |
| MOL000422   | kaempferol                    | Acetylcholinesterase       | ACHE                   | Hedysarum Multijugum Maxim.                 |

Supplementary Table S2. The CNVs of 26 COVID-19 target genes.

|        | amplification | deletion | diploid | amplification % | deletion % | diploid % |
|--------|---------------|----------|---------|-----------------|------------|-----------|
| SELP   | 285           | 5        | 267     | 51.17           | 0.9        | 47.94     |
| IL6    | 224           | 16       | 314     | 40.43           | 2.89       | 56.68     |
| IGFBP3 | 201           | 21       | 333     | 36.22           | 3.78       | 60        |
| GJA1   | 17            | 186      | 352     | 3.06            | 33.51      | 63.42     |
| LDLR   | 11            | 184      | 364     | 1.97            | 32.92      | 65.12     |
| ICAM1  | 12            | 178      | 366     | 2.16            | 32.01      | 65.83     |
| THBD   | 110           | 65       | 379     | 19.86           | 11.73      | 68.41     |
| ADRB2  | 51            | 116      | 387     | 9.21            | 20.94      | 69.86     |
| CD163  | 72            | 95       | 388     | 12.97           | 17.12      | 69.91     |
| ACHE   | 124           | 31       | 399     | 22.38           | 5.6        | 72.02     |
| CAV1   | 125           | 29       | 400     | 22.56           | 5.23       | 72.2      |
| SLPI   | 104           | 48       | 402     | 18.77           | 8.66       | 72.56     |
| PTGES  | 21            | 126      | 408     | 3.78            | 22.7       | 73.51     |
| MMP3   | 76            | 53       | 425     | 13.72           | 9.57       | 76.71     |
| EPHB2  | 55            | 64       | 442     | 9.8             | 11.41      | 78.79     |
| JUN    | 53            | 61       | 440     | 9.57            | 11.01      | 79.42     |
| PLAU   | 37            | 75       | 442     | 6.68            | 13.54      | 79.78     |
| ALDH2  | 46            | 57       | 450     | 8.32            | 10.31      | 81.37     |
| ALOX5  | 44            | 55       | 457     | 7.91            | 9.89       | 82.19     |
| SAA1   | 36            | 56       | 462     | 6.5             | 10.11      | 83.39     |
| CXCL2  | 33            | 58       | 463     | 5.96            | 10.47      | 83.57     |
| PRDX4  | 14            | 64       | 477     | 2.52            | 11.53      | 85.95     |
| TIMP1  | 25            | 45       | 484     | 4.51            | 8.12       | 87.36     |
| IL1A   | 56            | 9        | 490     | 10.09           | 1.62       | 88.29     |

|       |    |    |     |       |      |       |
|-------|----|----|-----|-------|------|-------|
| IL1B  | 56 | 9  | 490 | 10.09 | 1.62 | 88.29 |
| BMPR2 | 41 | 15 | 500 | 7.37  | 2.7  | 89.93 |

---
